# Supplementary material
Source: MDPI journal article supplement (https://www.mdpi.com/1424-2818/13/6/227)

**Table S1.** *P* values obtained from pairwise comparisons of the wild ruminants prevalence using Fisher's exact test.

Total lungworms

|             | Iberian Ibex | Red deer  | Fallow deer |
|-------------|--------------|-----------|-------------|
| Red deer    | 3.851e-02    | -         | -           |
| Fallow deer | 2.593e-08    | 1.038e-07 | -           |
| Mouflon     | 1.0          | 4.509e-04 | 5.805e-19   |

*C. ocreatus*

|             | Iberian Ibex | Red deer  | Fallow deer |
|-------------|--------------|-----------|-------------|
| Red deer    | 4.806e-04    | -         | -           |
| Fallow deer | 6.861e-05    | 1.0       | -           |
| Mouflon     | 1.977e-05    | 3.122e-24 | 7.144e-32   |

*M. capillaris*

|             | Iberian Ibex | Red deer  | Fallow deer |
|-------------|--------------|-----------|-------------|
| Red deer    | 2.811e-14    | -         | -           |
| Fallow deer | 2.373e-17    | 1.0       | -           |
| Mouflon     | 6.508e-01    | 4.449e-21 | 6.269e-28   |

*Protostrongylus* spp.

|             | Iberian Ibex | Red deer  | Fallow deer |
|-------------|--------------|-----------|-------------|
| Red deer    | 1.405e-08    | -         | -           |
| Fallow deer | 2.039e-10    | 1.0       | -           |
| Mouflon     | 4.000e-03    | 0.0001167 | 3.416e-06   |

*Dictyocaulus* spp.

|             | Iberian Ibex | Red deer | Fallow deer |
|-------------|--------------|----------|-------------|
| Red deer    | 1.0          | -        | -           |
| Fallow deer | 1.0          | 0.79498  | -           |
| Mouflon     | 0.2065       | 0.00474  | 0.00474     |

*N. linearis*

|             | Iberian Ibex | Red deer | Fallow deer |
|-------------|--------------|----------|-------------|
| Red deer    | 6.881e-13    | -        | -           |
| Fallow deer | 1.993e-15    | 1.0      | -           |

|         |           |           |           |
|---------|-----------|-----------|-----------|
| Mouflon | 8.770e-03 | 1.547e-09 | 6.881e-13 |
|---------|-----------|-----------|-----------|

# *Varestrongylus sagittatus*

|             |              |          |             |
|-------------|--------------|----------|-------------|
|             | Iberian Ibex | Red deer | Fallow deer |
| Red deer    | 1.0          | -        | -           |
| Fallow deer | 0.2489       | 0.003863 | -           |
| Mouflon     | 1.0          | 1.0      | 0.003863    |

# *Elaphostrongylus cervi*

|             |              |           |             |
|-------------|--------------|-----------|-------------|
|             | Iberian Ibex | Red deer  | Fallow deer |
| Red deer    | 5.796e-06    | -         | -           |
| Fallow deer | 1.0          | 4.280e-19 | -           |
| Mouflon     | 1.0          | 2.195e-13 | 1           |

**Table S2.** *P* values obtained from Kruskal–Wallis analysis for the commonly found nematodes species.

# *C. ocreatus*

|             |              |          |             |
|-------------|--------------|----------|-------------|
|             | Iberian Ibex | Red deer | Fallow deer |
| Red deer    | 3.5e-05      | -        | -           |
| Fallow deer | 1.1e-07      | -        | -           |
| Mouflon     | 0.00018      | < 2e-16  | < 2e-16     |

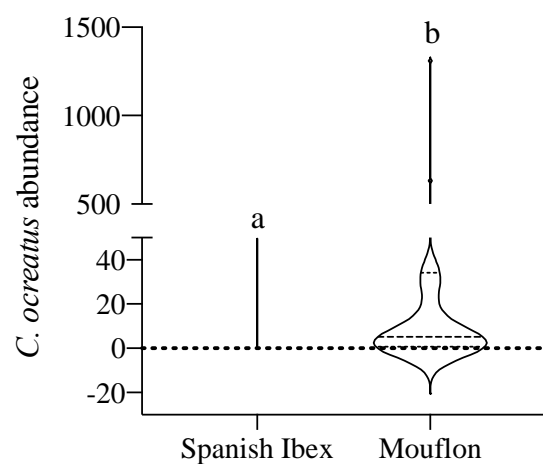

# *M. capillaris*

|             | Iberian Ibex | Red deer | Fallow deer |
|-------------|--------------|----------|-------------|
| Red deer    | 1e-15        | -        | -           |
| Fallow deer | <2e-16       | -        | -           |
| Mouflon     | 0.38         | <2e-16   | <2e-16      |

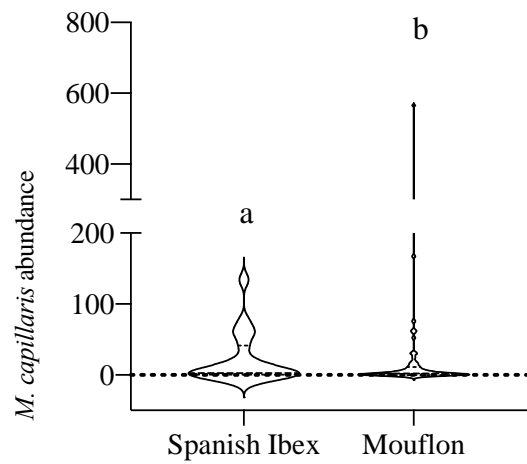

#### *N. linearis*

|             | Iberian Ibex | Red deer | Fallow deer |
|-------------|--------------|----------|-------------|
| Red deer    | 2.4e-14      | -        | -           |
| Fallow deer | < 2e-16      | -        | -           |
| Mouflon     | 0.0019       | 2.4e-08  | 1.9e-12     |

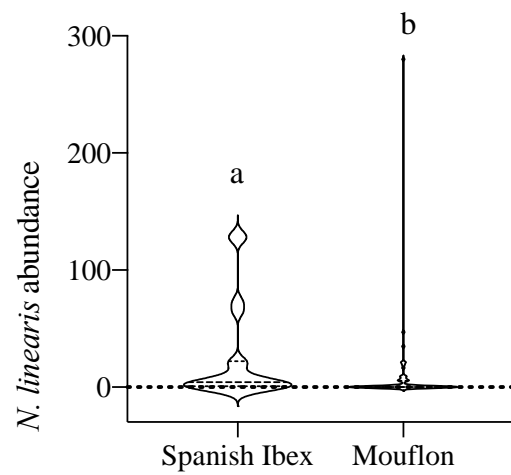

#### *Protostrongylus* spp.

|             | Iberian Ibex | Red deer | Fallow deer |
|-------------|--------------|----------|-------------|
| Red deer    | 2.5e-10      | -        | -           |
| Fallow deer | 9.9e-16      | -        | -           |
| Mouflon     | 0.0025       | 0.0002   | 2.1e-06     |

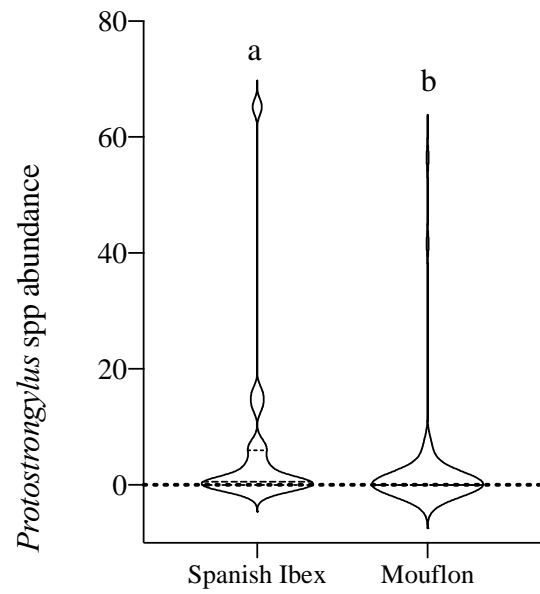

*Dictyocaulus* spp.

|             | Iberian Ibex | Red deer | Fallow deer |
|-------------|--------------|----------|-------------|
| Red deer    | -            | -        | -           |
| Fallow deer | 0.5620       | 0.3483   | -           |
| Mouflon     | 0.1242       | 0.0032   | 0.0032      |

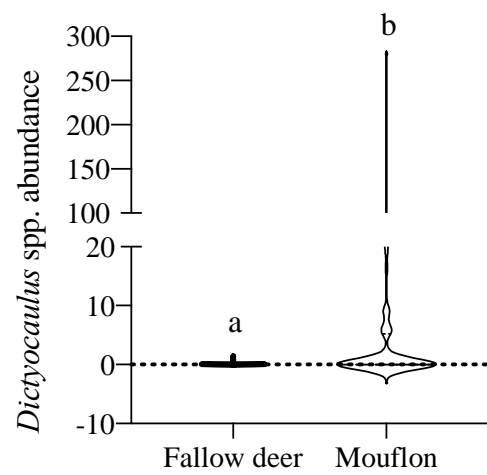

Supplement: s1 [file s1]
